# Supplementary material for: Assessment of Four Engineered PET Degrading Enzymes Considering Large-Scale Industrial Applications
Source: PubMed Central journal article supplement (PMC10594578; doi:10.1021/acscatal.3c02922), 2023-09-26
Supplement: cs3c02922_si_001.pdf [file cs3c02922_si_001.pdf]

## Supporting information for

### Assessment of Four Engineered PET Degrading Enzymes Considering Large-Scale Industrial Applications

*Grégory Arnal<sup>1</sup>, Julien Anglade<sup>2</sup>, Sabine Gavalda<sup>1</sup>, Vincent Tournier<sup>1</sup>, Nicolas Chabot<sup>1</sup>, Uwe T. Bornscheuer<sup>3,\*</sup>, Gert Weber<sup>4,\*</sup> and Alain Marty<sup>1,\*</sup>*

<sup>1</sup> Carbios, Parc Cataroux – Bâtiment B80, 8 rue de la Grolière, 63100 Clermont-Ferrand, France

<sup>2</sup> Toulouse Biotechnology Institute, TBI, Université de Toulouse, CNRS, INRAE, INSA, 135 avenue de Rangueil, 31077 Toulouse Cedex 4, France

<sup>3</sup> University of Greifswald, Institute of Biochemistry, Biotechnology & Enzyme Catalysis, Felix-Hausdorff-Str. 4, 17487 Greifswald, Germany

<sup>4</sup> Helmholtz-Zentrum Berlin für Materialien und Energie, Macromolecular Crystallography, Albert-Einstein-Straße 15, D-12489 Berlin, Germany

#### KEYWORDS

polyethylene terephthalate (PET), polyethylene terephthalate hydrolases, industrial enzymatic PET recycling, enzyme engineering, PET hydrolysis reaction conditions

\* Correspondence and requests for materials should be addressed to U.T.B. (email: [uwe.bornscheuer@uni-greifswald.de](mailto:uwe.bornscheuer@uni-greifswald.de)) or to G.W. (email: [gert.weber@helmholtz-berlin.de](mailto:gert.weber@helmholtz-berlin.de)) or to A. M. (email: [Alain.Marty@carbios.com](mailto:Alain.Marty@carbios.com))

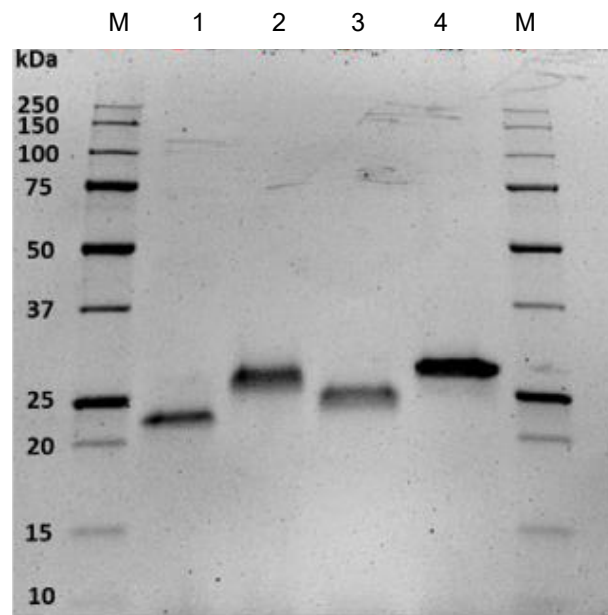

**Supplementary Figure 1.** SDS-PAGE analysis of 1- LCC<sup>ICCG</sup>, 2- FAST-PETase, 3- HotPETase, 4- PES-H1<sup>L92F/Q94Y</sup>. M for Protein ladder Precision Plus.

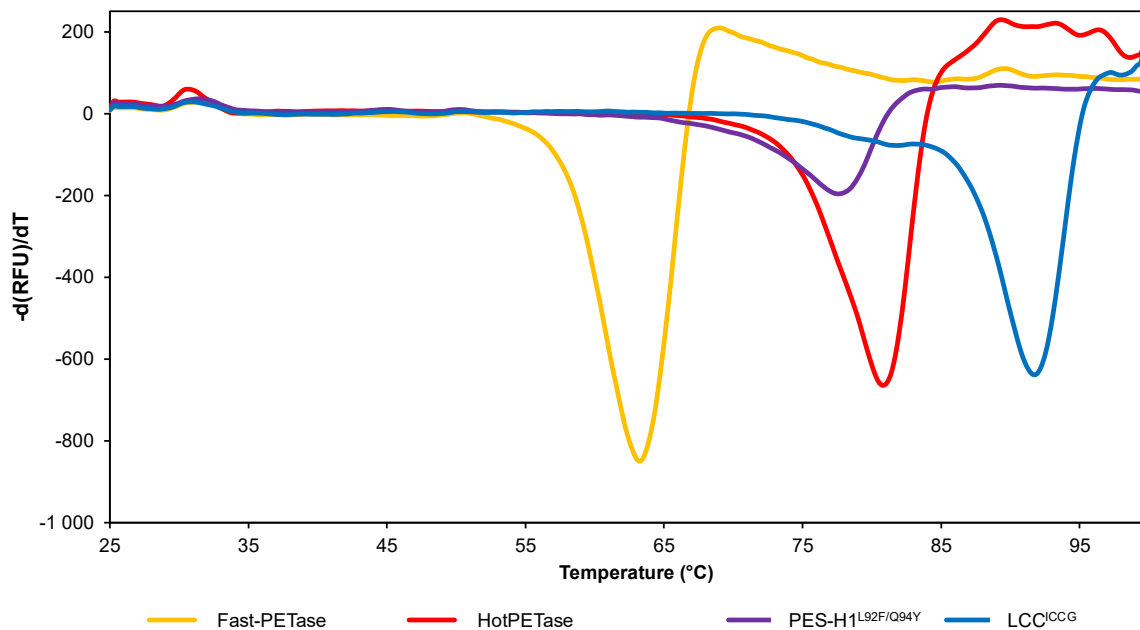

**Supplementary Figure 2.** DSF thermal denaturation curves for FAST-PETase (yellow), PES-H1<sup>L92F/Q94Y</sup> (purple) and LCC<sup>ICCG</sup> (blue) in potassium phosphate buffer 100 mM, pH 8.0, and for HotPETase (red) in glycine-OH buffer 100 mM, pH 9.2.

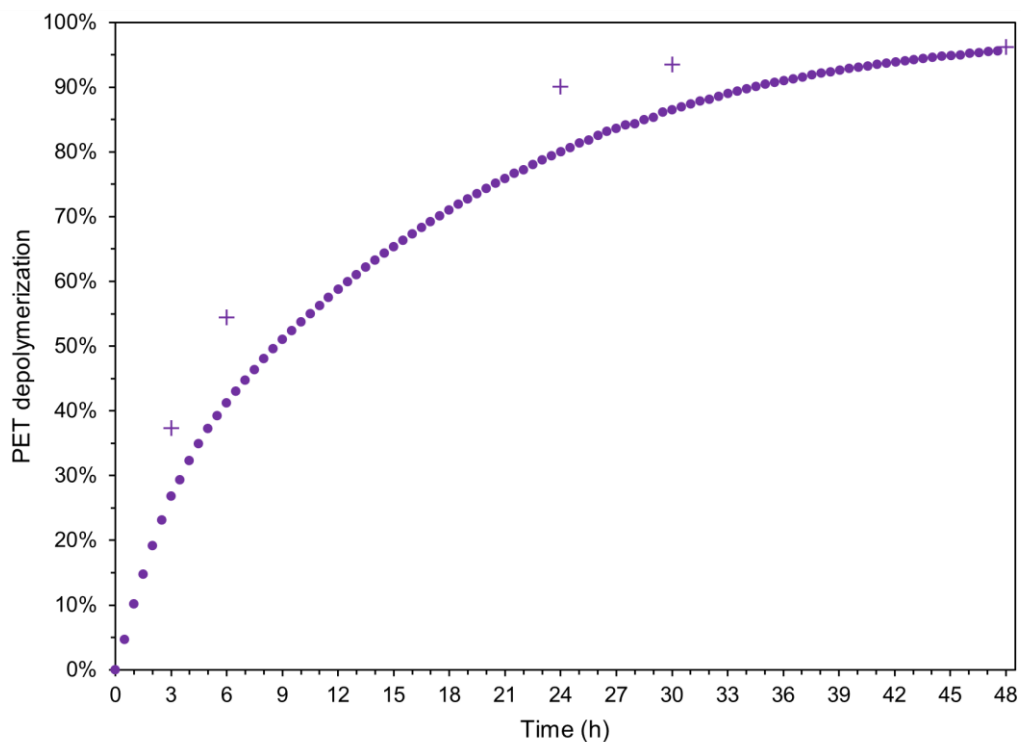

**Supplementary Figure 3. 16.5% (w/w) PcW-PET depolymerization performed in a reactor using PES-H1<sup>L92F/Q94Y</sup> over 48 h of hydrolysis.** Reaction performed at 60 °C, pH 8.0 using 16.5% (w/w) of PcW-PET and PES-H1<sup>L92F/Q94Y</sup> at a concentration of 1 mg<sub>enzyme</sub> g<sub>PET</sub><sup>-1</sup>. Purple dots represent the PET conversion in % measured by the NaOH consumption considering an exclusive production of TPA and MEG (2 mol of NaOH is consumed to titrate 1 mol of the diacid TPA). Purple crosses represent the percentage of PET conversion adjusted by considering the TPA/MHET ratio measured by UHPLC analysis at different time (1 mol of NaOH is consumed to titrate 1 mol of the monoacid MHET).

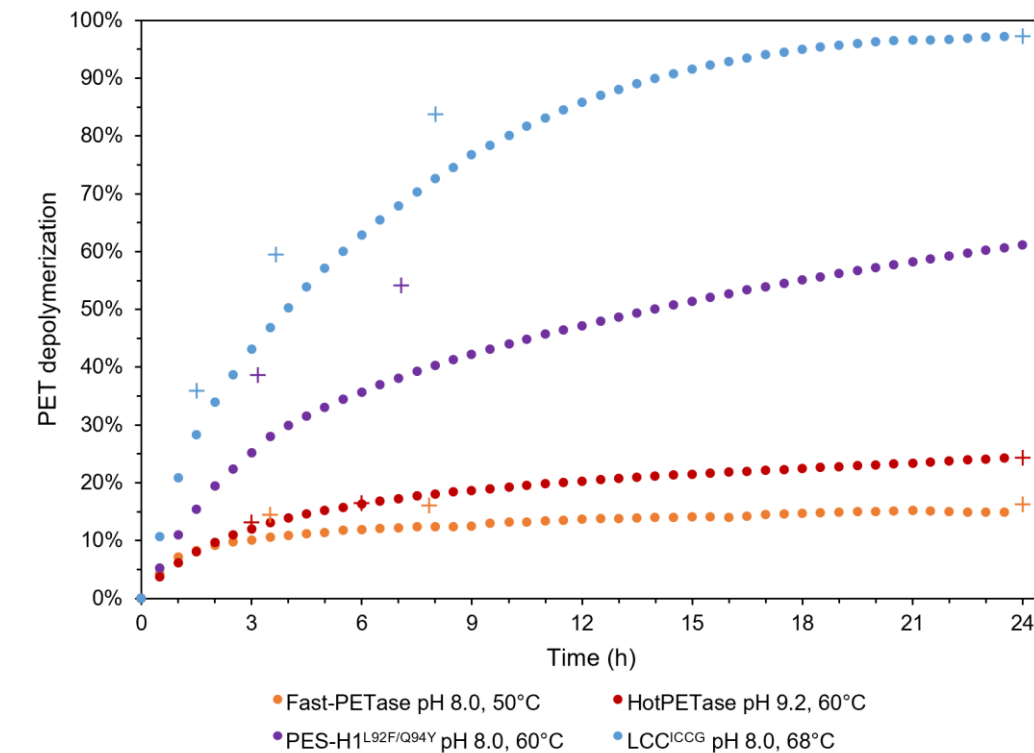

**Supplementary Figure 4. Comparison of 20% (w/w) PcW-PET depolymerizations performed by the four enzymes at bioreactor scale.** Enzyme-based PET depolymerizations were performed using FAST-PETase at 50 °C, pH 8.0 (orange), HotPETase at 60 °C, pH 9.2 (red), PES-H1<sup>L92F/Q94Y</sup> at 60 °C, pH 8.0 (purple) and LCC<sup>ICCG</sup> at 68 °C, pH 8.0 (blue) of a 200 g<sub>PET</sub> kg<sup>-1</sup> solution with 1 mg<sub>enzyme</sub> g<sub>PET</sub><sup>-1</sup>. Dots represent the PET conversion in % measured by the NaOH consumption considering an exclusive production of TPA and EG (2 mol of NaOH is consumed to titrate 1 mol of the diacid TPA). Crosses represent the percentage of PET conversion adjusted by considering the TPA/MHET ratio (1 mol of NaOH is consumed to titrate 1 mol of the monoacid MHET).

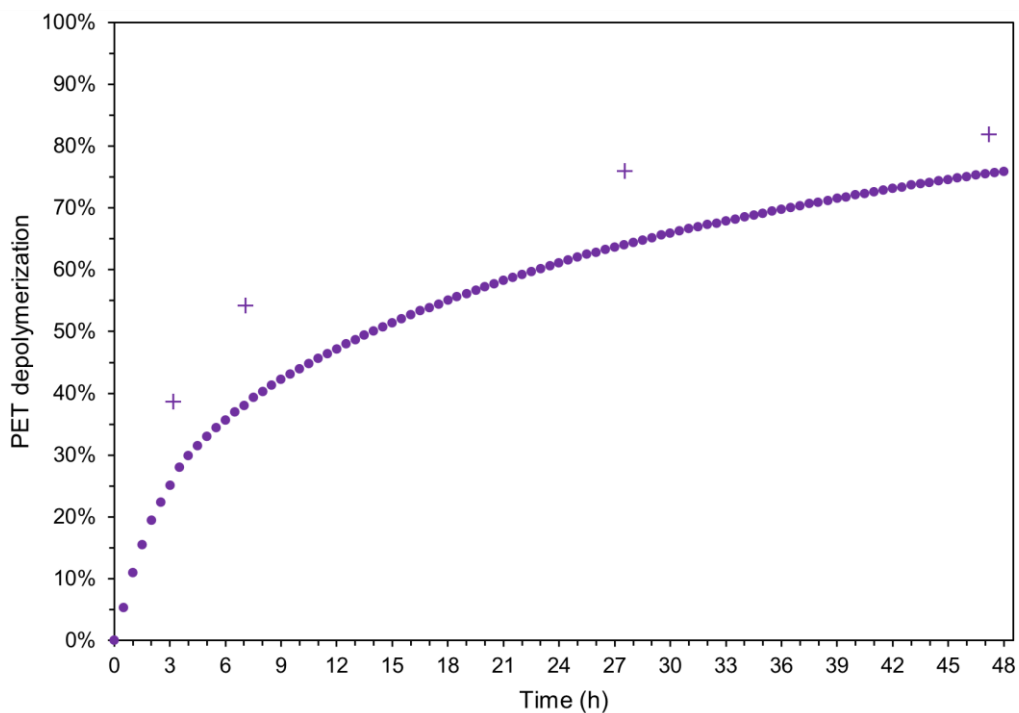

**Supplementary Figure 5. 20% (w/w) PcW-PET depolymerization performed in a reactor using PES-H1<sup>L92F/Q94Y</sup> over 48 h of hydrolysis.** Reaction performed at 60 °C, pH 8.0 using 20% (w/w) of PcW-PET and PES-H1<sup>L92F/Q94Y</sup> at a concentration of 1 mg<sub>enzyme</sub> g<sub>PET</sub><sup>-1</sup>. Purple dots represent the PET conversion in % measured by the NaOH consumption considering an exclusive production of TPA and MEG (2 mol of NaOH is consumed to titrate 1 mol of the diacid TPA). Purple crosses represent the percentage of PET conversion adjusted by considering the TPA/MHET ratio measured by UHPLC analysis at different time (1 mol of NaOH is consumed to titrate 1 mol of the monoacid MHET).

**Supplementary Table 1.**  $T_m$  assessments of FAST-PETase, HotPETase, PES-H1<sup>L92F/Q94Y</sup> and LCC<sup>ICCG</sup> in 100 mM potassium phosphate buffer pH 8.0, and of HotPETase in 100 mM glycine-OH buffer pH 9.2 performed by DSF and comparison with the previously published  $T_m$ .

| Enzyme                      | $T_m$ assessed<br>(°C) | $T_m$ reported<br>(°C)                                         |
|-----------------------------|------------------------|----------------------------------------------------------------|
| FAST-PETase                 | 63.3 ± 0.0             | 67.1 <sup>1</sup><br>DPBS pH 7.0                               |
| HotPETase                   | 80.7 ± 0.0             | 82.5 <sup>2</sup><br>50 mM glycine-OH, pH 9.2                  |
| PES-H1 <sup>L92F/Q94Y</sup> | 77.6 ± 0.2             | 78.2 <sup>3</sup><br>50 mM potassium phosphate pH 8.0          |
| LCC <sup>ICCG</sup>         | 91.7 ± 0.2             | 94.0 ± 0.2 <sup>4</sup><br>20 mM tris-HCl, 300 mM NaCl, pH 8.0 |

**Supplementary Table 2.** Performances measured at different temperatures during the hydrolysis of Gf-PET for FAST-PETase, HotPETase, PES-H1<sup>L92F/Q94Y</sup> and LCC<sup>ICCG</sup> in 100 mM potassium phosphate buffer pH 8.0, and for HotPETase in 100 mM glycine-OH buffer pH 9.2. Red hashes indicate the value of specific activity that was calculated over 2 h of reaction instead of 4 h and might be underestimated due to poor stability of the enzyme at specified temperature.

| Temperature | Performance criteria                                                        | FAST-PETase        | HotPETase            | PES-H1 <sup>L92F/Q94Y</sup> | LCC <sup>ICCG</sup> |
|-------------|-----------------------------------------------------------------------------|--------------------|----------------------|-----------------------------|---------------------|
| 45 °C       | Specific activity ( $\mu\text{mol h}^{-1} \text{mg}_{\text{enzyme}}^{-1}$ ) | 245.5 $\pm$ 12.5   | 210.9 $\pm$ 13.5     | 67.2 $\pm$ 0.6              | 55.8 $\pm$ 15.3     |
|             | PET depolymerization at 24h (%)                                             | 8.7 $\pm$ 2.3      | 10.4 $\pm$ 0.7       | 4.9 $\pm$ 0.4               | 5.2 $\pm$ 0.6       |
|             | PET final depolymerization (%)                                              | 9.0 $\pm$ 2.3      | 12.2 $\pm$ 0.9       | 6.6 $\pm$ 0.6               | 8.0 $\pm$ 0.6       |
| 50 °C       | Specific activity ( $\mu\text{mol h}^{-1} \text{mg}_{\text{enzyme}}^{-1}$ ) | 347.5 $\pm$ 46.1   | 429.7 $\pm$ 56.1     | 151.0 $\pm$ 22.4            | 176.7 $\pm$ 7.4     |
|             | PET depolymerization at 24h (%)                                             | 9.9 $\pm$ 3.3      | 15.3 $\pm$ 3.2       | 8.8 $\pm$ 3.1               | 12.8 $\pm$ 0.6      |
|             | PET final depolymerization (%)                                              | 9.6 $\pm$ 3.2      | 16.2 $\pm$ 3.7       | 11.9 $\pm$ 5.1              | 20.8 $\pm$ 1.7      |
| 60 °C       | Specific activity ( $\mu\text{mol h}^{-1} \text{mg}_{\text{enzyme}}^{-1}$ ) | 148.4 $\pm$ 55.6 # | 1059.5 $\pm$ 35.5    | 369.4 $\pm$ 33.4            | 575.7 $\pm$ 45.8    |
|             | PET depolymerization at 24h (%)                                             | 1.5 $\pm$ 0.4      | 25.4 $\pm$ 3.7       | 10.9 $\pm$ 1.7              | 23.1 $\pm$ 3.4      |
|             | PET final depolymerization (%)                                              | 1.6 $\pm$ 0.4      | 25.0 $\pm$ 3.8       | 10.7 $\pm$ 1.8              | 28.0 $\pm$ 4.9      |
| 65 °C       | Specific activity ( $\mu\text{mol h}^{-1} \text{mg}_{\text{enzyme}}^{-1}$ ) | 20.8 $\pm$ 11.0 #  | 1350.8 $\pm$ 135.8 # | 481.3 $\pm$ 44.7 #          | 752.8 $\pm$ 64.5    |
|             | PET depolymerization at 24h (%)                                             | 0.3 $\pm$ 0.4      | 12.7 $\pm$ 1.7       | 7.2 $\pm$ 1.2               | 31.3 $\pm$ 9.8      |
|             | PET final depolymerization (%)                                              | 0.3 $\pm$ 0.4      | 12.3 $\pm$ 1.5       | 7.0 $\pm$ 1.2               | 34.4 $\pm$ 10.5     |
| 68 °C       | Specific activity ( $\mu\text{mol h}^{-1} \text{mg}_{\text{enzyme}}^{-1}$ ) | 7.6 $\pm$ 3.9 #    | 1038.5 $\pm$ 137.7 # | 404.3 $\pm$ 39.9 #          | 962.8 $\pm$ 28.7    |
|             | PET depolymerization at 24h (%)                                             | 0.08 $\pm$ 0.02    | 9.1 $\pm$ 0.8        | 3.9 $\pm$ 0.6               | 41.3 $\pm$ 5.8      |
|             | PET final depolymerization (%)                                              | 0.12 $\pm$ 0.02    | 8.3 $\pm$ 0.8        | 3.9 $\pm$ 0.6               | 45.8 $\pm$ 5.0      |



**Supplementary Table 3.** Performances of FAST-PETase at pH 8.0, 50 °C, HotPETase at pH 9.2, 60 °C, PES-H1<sup>L92F/Q94Y</sup> at pH 8.0, 60 °C and LCC<sup>ICCG</sup> at pH 8.0, 68 °C during the hydrolysis of 16.5% (w/w) PcW-PET in reactors at 1 mg<sub>enzyme</sub> g<sub>PET</sub><sup>-1</sup>. n.a. - not applicable; n.d. - not determined.

| Enzyme                      | Time<br>(h) | TPA molar<br>(%) | MHET molar<br>(%) | Calculated PET conversion |                         |                |
|-----------------------------|-------------|------------------|-------------------|---------------------------|-------------------------|----------------|
|                             |             |                  |                   | NaOH                      | after TPA/MHET molar    | Residual solid |
|                             |             |                  |                   | consumption<br>(%)        | ratio adjustment<br>(%) | weight<br>(%)  |
| FAST-PETase                 | 3.0         | 42               | 58                | 10.3                      | 14.5                    | n.a.           |
|                             | 6.0         | 48               | 52                | 12.1                      | 16.3                    | n.a.           |
|                             | 24.0        | 64               | 36                | 14.9                      | 18.1                    | 18.6           |
| HotPETase                   | 3.0         | 79               | 21                | 12.5                      | 14.0                    | n.a.           |
|                             | 6.0         | 98               | 2                 | 17.6                      | 17.9                    | n.a.           |
|                             | 24.0        | 100              | 0                 | 26.4                      | 26.4                    | 28.7           |
| PES-H1 <sup>L92F/Q94Y</sup> | 3.0         | 43               | 57                | 26.8                      | 37.4                    | n.a.           |
|                             | 6.0         | 51               | 49                | 41.2                      | 54.4                    | n.a.           |
|                             | 24.0        | 78               | 22                | 80.0                      | 90.1                    | n.a.           |
|                             | 30.0        | 85               | 15                | 86.5                      | 93.5                    | n.a.           |
|                             | 48.0        | 99               | 1                 | 95.7                      | 96.2                    | 98.6           |
| LCC <sup>ICCG</sup>         | 3.0         | 57               | 43                | 45.3                      | 57.6                    | n.a.           |
|                             | 6.0         | 71               | 29                | 67.3                      | 78.6                    | n.a.           |
|                             | 24.0        | 100              | 0                 | 97.3                      | 97.3                    | 98.1           |

**Supplementary Table 4.** Performances of FAST-PETase at pH 8.0, 50 °C, HotPETase at pH 9.2, 60 °C, PES-H1<sup>L92F/Q94Y</sup> at pH 8.0, 60 °C and LCC<sup>ICCG</sup> at pH 8.0, 68 °C during the hydrolysis of 20% (w/w) PcW-PET in reactors at 1 mg<sub>enzyme</sub> g<sub>PET</sub><sup>-1</sup>. n.a. - not applicable; n.d. - not determined.

| Enzyme                      | Time<br>(h) | TPA molar<br>(%) | MHET molar<br>(%) | Calculated PET conversion |                         |                |
|-----------------------------|-------------|------------------|-------------------|---------------------------|-------------------------|----------------|
|                             |             |                  |                   | NaOH                      | after TPA/MHET molar    | Residual solid |
|                             |             |                  |                   | consumption<br>(%)        | ratio adjustment<br>(%) | weight<br>(%)  |
| FAST-PETase                 | 3.5         | 45               | 55                | 10.5                      | 14.5                    | n.a.           |
|                             | 7.8         | 54               | 46                | 12.4                      | 16.1                    | n.a.           |
|                             | 24.0        | 83               | 17                | 14.9                      | 16.3                    | 16.3           |
| HotPETase                   | 3.0         | 82               | 18                | 12.0                      | 13.2                    | n.a.           |
|                             | 6.0         | 98               | 2                 | 16.3                      | 16.5                    | n.a.           |
|                             | 24.0        | 100              | 0                 | 24.3                      | 24.3                    | 24.1           |
| PES-H1 <sup>L92F/Q94Y</sup> | 3.2         | 35               | 64                | 25.8                      | 38.6                    | n.a.           |
|                             | 7.1         | 43               | 56                | 38.4                      | 54.2                    | n.a.           |
|                             | 24.0        | n.d.             | n.d.              | 61.1                      | n.d.                    | n.a.           |
|                             | 27.5        | 68               | 32                | 64.0                      | 75.9                    | n.a.           |
|                             | 47.2        | 85               | 14                | 75.6                      | 81.9                    | 81.1           |
| LCC <sup>ICCG</sup>         | 1.5         | 57               | 43                | 28.3                      | 35.9                    | n.a.           |
|                             | 3.7         | 61               | 39                | 47.8                      | 59.5                    | n.a.           |
|                             | 8.0         | 73               | 27                | 72.5                      | 83.7                    | n.a.           |
|                             | 24.0        | 100              | 0                 | 97.2                      | 97.2                    | 98.1           |

**Supplementary Table 5.** Productivities of the four different PET hydrolases using 20% (w/w) post-consumer colored-flake PET waste powder (PcW-PET) as substrate.

| <b>Enzyme</b>                     | <b>Maximum productivity</b><br>[g <sub>TPAeq</sub> L <sup>-1</sup> h <sup>-1</sup> ] | <b>Average productivity</b><br>[g <sub>TPAeq</sub> L <sup>-1</sup> h <sup>-1</sup> ] |
|-----------------------------------|--------------------------------------------------------------------------------------|--------------------------------------------------------------------------------------|
| <b>FAST-PETase</b>                | 15.9                                                                                 | 1.1 <sup>a</sup>                                                                     |
| <b>HotPETase</b>                  | 17.0                                                                                 | 1.8 <sup>a</sup>                                                                     |
| <b>PES-H1<sup>L92F/Q94Y</sup></b> | 17.3                                                                                 | 4.4 <sup>a</sup> ; 2.7 <sup>b</sup>                                                  |
| <b>LCC<sup>ICCG</sup></b>         | 34.5                                                                                 | 7.0 <sup>a</sup>                                                                     |

<sup>a</sup> at 24 h. <sup>b</sup> at 48 h.

**Nucleotide and expressed amino sequences for production of LCC<sup>ICCG</sup>, FAST-PETase, HotPETase and PES-H1<sup>L92F/Q94Y</sup>.** All nucleotide sequences were codon-optimized for expression in *E. coli* and were inserted between *NdeI* and *XhoI* restriction enzyme sites of pET-26b(+) bacterial expression plasmid. Codons mutated from the wild type enzyme are indicated in red.

**LCC<sup>ICCG</sup> nucleotide sequence:**

ATGAGCAACCCGTACCAGCGTGGCCCCGAATCCGACCCGCAGCGCACTGACCGCAGATGGCCCCGTTTAGCGTGGCA  
ACCTACACCGTCTCACGCCTGTCAGTCTCGGGTTTTGGCGGTGGCGTGATTTATTACCCGACCGGCACGTCTCTG  
ACGTTCCGGTGGCATCGCGATGAGTCCGGGTTATACCGCAGATGCTAGCTCTCTGGCATGGCTGGGTTCGTCGCCTG  
GCTTCCCATGGCTTTGTGGTTCTGGTGATTAACACGAATTCACGTTTCGATGGCCGGACAGCCGCGCCTCTCAG  
CTGAGTGCCGCCCTGAACTACCTGCGTACCAGTTCCCCGAGCGCCGTTTCGCGCACGTCTGGATGCAAATCGTCTG  
GCGGTTGCCGGTCATTCTATGGGTGGCGGTGGCACCCCTGCGTATTGCAGAACAAAACCCGAGCCTGAAAGCGGCT  
GTCCCGCTGACCCCGTGGCACACCGATAAAAACGTTTAAATACCAGTGTCCCGGTGCTGATTGTTGGCGCAGAAGCT  
GACACCGTGGCGCCGGTTTTCGCAGCATGCCATCCCGTTTTATCAAAACCTGCCGAGCACCACGCCGAAAGTTTAC  
GTCGAACTGTGCAACGCATCGCACATTGCTCCGAATAGCAACAATGCGGCCATTTCCGTTTATACGATCTCATGG  
ATGAAACTGTGGGTCGATAATGACACCCGTTACCGCCAGTTCCTGTGTAATGTGAACGACCCGGCTCTGTGCGAC  
TTCCGCACCAATAATCGCCACTGCCAACTCGAGCACCACCACCACCACCACTGA

**LCC<sup>ICCG</sup> expressed amino acid sequence (amino acid numbering starts at 35):**

M<sup>35</sup>SNPYQRGNPNTRSALTADGPFVSVATYTVSRLSVSGFGGGVIYYPTGTSLTFGGIAMSPGYTADASSLAWLGRR  
LASHGFVVLVINTNSRFDGPDSRASQLSAALNYLRTSSPSAVRARLDANRLAVAGHSMGGGGTLR<sup>I</sup>AEQNPSLKA  
AVPLTPWHTDKTFNTSVPVLI<sup>V</sup>GAEADTVAPVSQHAIPFYQNL<sup>P</sup>STTPKVYVEL<sup>C</sup>NASH<sup>I</sup>APNSNNA<sup>I</sup>ISVY<sup>T</sup>IS  
WMKLWVDNDTRYRQFLCNVNDPAL<sup>C</sup>DFRTNNRHCQLEHHHHHH

**FAST-PETase nucleotide sequence with a pelB leader sequence (lowercase) upfront the nucleotide sequence encoding for the mature protein (uppercase):**

atgaaatacctgctgccgaccgctgctgctggtctgctgctcctcgctgcccagccggcgatggccCAGACCAAT  
CCATACGCTCGTGGTCCAAATCCGACCGCCGCAAGCCTGGAAGCAAGCGCAGGTCCATTTACCGTTCGCAGCTTT  
ACCGTTAGCCGTCCAAGCGGTTATGGTGCAGGTACCGTTTATTATCCGACCAATGCAGGTGGCACCGTTGGTGCA  
ATTGCTATTGTTCCGGGTTATACCGCCC GCCAGAGCAGCATTA<sup>A</sup>AATGGTGGGGTCCGCGCCTGGCCAGTCATGGT  
TTTGTGTTATTACCATTGATACCAATAGCACCCCTGGATCAGCCG<sup>GAA</sup>AGCCGTTCAAGTCAGCAGATGGCAGCA  
CTGCGTCAGGTGGCGTCTCTGAATGGTACTAGTAGCAGTCCGATTTATGGTAAAGTTGATACCGCACGTATGGGC  
GTTATGGGTTGGAGTATGGGTGGTGGTGGTAGTCTGATTAGTGCCGCTAATAATCCGAGCCTGAAAGCAGCGGCA

CCGCAGGCACCGTGGCATAGCAGTACCAACTTTAGTAGCGTTACGGTTCCGACCCTGATTTTTGCTTGTGAAAAT  
GATAGCATTGCACCGGTTAATAGCAGCGCACTGCCGATTTATGATTCAATGAGCCAGAATGCAAAAACAGTTTCTG  
GAAATTAAAGGCGGTAGCCATTCTTGTGCCAATAGTGGTAATAGCAATCAGGCACTGATTGGTAAAAAGGGTGT  
GCCTGGATGAAACGTTTTATGGATAACGATACCCGTTATAGCACCTTTCATGTGAAAATCCGAATAGTACC GCC  
GTTAGTGATTTTCGCACCGCAAATTGCAGTCTCGAGCACCACCACCACCACCACTGA

**FAST-PETase expressed amino acid sequence (amino acid numbering starts at 28):**

Q<sup>28</sup>TNPYARGPNPTAASLEASAGPFTVRSFTVSRPSGYGAGTVYYPTNAGGTVGAI AIVPGYTARQSSIKWWGPRL  
ASHGFVVITIDTNSTLDQPE SRSSQQMAALRQVASLNGTSSSPIYGVDTARMGVMGWSMGGGSLISAANNPSL  
KAAAPQAPWHSSTNFSVTVPTLIFACENDSIAPVNSSALPIYDSMSQNAKQFLEIKGGSHSCANSNSNQALIG  
KKGVAWMKRFMDNDTRYSTFACENPNSTAVSDFRTANCSLEHHHHHHH

**HotPETase nucleotide sequence:**

ATGCAGACTAACCCTATGCTCGCGGGCCGAATCCTACAGCGCCTCGTTGGAAGCCAGTGCAGGTCCCTTCACC  
GTACGTTTCGTTTACTGTTGCGCGTCCAGTGGGATATGGGGCTGGCACCGTCTATTATCCGACTAACGCCGGTGGT  
ACTGTGGGCGCAATCGCCATTGTCCCCGGCTACACTGCAACTCAATCCTCGATT AAT TGGTGGGGACCACGCTTG  
GCTAGCCACGGGTTTGTGTGATCACCATCGATACTAACAGTACGTTGGAC AAGCCA GAGAGTCGCAGCTCTCAG  
CAGATGGCGGCATTACGCCAGGTGGCGAGCTTAAATGGGACGAGTTCAAGTCCAATTTATGGCAAGGTCGATACC  
GCCCCTGGTGGAGTAATGGGCTGGAGTATGGGTGGCGGCGGATCTCTTATCTCGGCAGCGAATAATCCAAGCCTG  
AAGGCAGCAGCCGTTATGGCACCCCTGGCATAGTAGTACGAACTTTTCGTCTGTTACGGTTCCTACGCTTATCTTT  
GCCTGTGAGAATGATAGGATCGCACCAGTGAAGGAGTACGCCTTGCCAATTTACGACTCGATGTCGCTCAACGCT  
AAACAGTTTCTTGAGATTGTGGGGGCTCTCACTCTTGTGCC TGTAGTGGGAATCCAATCAAGCCCTTATCGGA  
ATGAAGGGCGTTGCTTGGATGAAGCGCTTCATGGACAATGACACTCGTTATTCA CAGTTCGCTTGCGAAAACCCA  
AACTCAACC GCCGTATGTGATTTTCGCACTGCTAACTGCAGCCTCGAGCACCACCACCACCACCACTGA

**HotPETase expressed amino acid sequence (amino acid numbering starts at 27):**

M<sup>27</sup>QNPYARGPNPTAASLEASAGPFTVRSFTVAREVGYGAGTVYYPTNAGGTVGAI AIVPGYTATQSSINWWGPR  
LASHGFVVITIDTNSTLDKPE SRSSQQMAALRQVASLNGTSSSPIYGVDTARGGVMGWSMGGGSLISAANNPS  
LKAAAVMAPWHSSTNFSVTVPTLIFACENDRIAPVKEYALPIYDSMSLNAKQFLEICGGSHSCACSGNSNQALI  
GMKGVAMKRFMDNDTRYSQFACENPNSTAVCDFRTANCSLEHHHHHHH

**PES-H1<sup>L92F/Q94Y</sup> nucleotide sequence:**

ATGGCGAACCCGTACGAGCGCGGGCCCGATCCCACCGAGTCGAGCATCGAGGCCGTCCGCGGGCCGTTTCGCCGTG  
GCCCAGACGACGGTGTTCGAGGCTCCAGGCCGACGGCTTCGGCGGGCGGGACCATCTACTACCCGACCGACACGAGC  
CAGGGCACCTTCGGTGCGGTGGCGATCTCGCCGGGGTTCACGGCGGGCCAGGAGAGCATCGCCTGGCTCGGCCCC  
CGCATCGCGTCGCAGGGCTTCGTGGTGATCACGATCGACACGATCACGCGCTTCGACTATCCCGACAGCCGGGGT  
CGCCAGCTGCAGGCCGCGCTCGACCACCTGCGCACCAACAGCGTCGTGCGCAACCCGGATCGACCCGAACCCGGATG  
GCGGTTCATGGGCCACTCGATGGGCGGGCGGGGGCGCTGTCCGCCGCGGCGAACAACACGAGCCTCGAGGCCGCC  
ATCCCGCTGCAGGGCTGGCACACCCGGAAGAAGTGGTCGAGCGTTCGGACCGCCGACCCTGGTGGTCGGGGCCCAG  
CTCGACACCATCGCGCCGGTGGAGCTCGCACTCGGAGGCCTTCTACAACAGCCTGCCGAGCGACCTCGACAAGGCG  
TACATGGAGCTCCGCGGGGCCAGCCACCTCGTGTGGAACACGCCCCGACACGACGACCGCGAAGTACAGCATCGCC  
TGGCTCAAGCGGTTTCGTGACGACGACCTCCGCTACGAGCAGTTCCTGTGCCCGGCGCCGGACGACTTCGCGGATC  
TCCGAGTACCGCTCCACCTGCCCGTTCCTCGAGCACCACCACCACCACCACTGA

**PES-H1<sup>L92F/Q94Y</sup> expressed amino acid sequence (amino acid numbering starts at 0):**

M<sup>0</sup>ANPYERGPDPTESSIEAVRGPFAVAQTTVSRLQADGFGGGTIYYPTDTSQGTFGAVAI SPGFTAGQESI AWLG  
PRIASQGFVVITIDTITRFDY PDSRGRQLQAALDHLRTNSVVRNRIDPNRMAVMGHSMGGGALSAAAANNTSLEA  
AIPLQGWHTRKNWSSVRTPTLVVGAQLDTIAPVSSHSEAFYNSLPSDLKAYMELRGASHLVSNTPDTTAKYSI  
AWLKRFVDDDLRYEQFLCPAPDDFAISEYRSTCPFLEHHHHHH

## Bibliography

- (1) Lu, H.; Diaz, D. J.; Czarnecki, N. J.; Zhu, C.; Kim, W.; Shroff, R.; Acosta, D. J.; Alexander, B. R.; Cole, H. O.; Zhang, Y.; Lynd, N. A.; Ellington, A. D.; Alper, H. S. Machine Learning-Aided Engineering of Hydrolases for PET Depolymerization. *Nature* **2022**, *604* (7907), 662–667. <https://doi.org/10.1038/s41586-022-04599-z>.
- (2) Bell, E. L.; Smithson, R.; Kilbride, S.; Foster, J.; Hardy, F. J.; Ramachandran, S.; Tedstone, A. A.; Haigh, S. J.; Garforth, A. A.; Day, P. J. R.; Levy, C.; Shaver, M. P.; Green, A. P. Directed Evolution of an Efficient and Thermostable PET Depolymerase. *Nat. Catal.* **2022**, *5* (8), 673–681. <https://doi.org/10.1038/s41929-022-00821-3>.
- (3) Pfaff, L.; Gao, J.; Li, Z.; Jäckering, A.; Weber, G.; Mican, J.; Chen, Y.; Dong, W.; Han, X.; Feiler, C. G.; Ao, Y. F.; Badenhorst, C. P. S.; Bednar, D.; Palm, G. J.; Lammers, M.; Damborsky, J.; Strodel, B.; Liu, W.; Bornscheuer, U. T.; Wei, R. Multiple Substrate Binding Mode-Guided Engineering of a Thermophilic PET Hydrolase. *ACS Catal.* **2022**, *12* (15), 9790–9800. <https://doi.org/10.1021/acscatal.2C02275>.
- (4) Tournier, V.; Topham, C. M.; Gilles, A.; David, B.; Folgoas, C.; Moya-Leclair, E.; Kamionka, E.; Desrousseaux, M. L.; Texier, H.; Gavalda, S.; Cot, M.; Guémard, E.; Dalibey, M.; Nomme, J.; Cioci, G.; Barbe, S.; Chateau, M.; André, I.; Duquesne, S.; Marty, A. An Engineered PET Depolymerase to Break down and Recycle Plastic Bottles. *Nature* **2020**, *580* (7802), 216–219. <https://doi.org/10.1038/s41586-020-2149-4>.
